# Supplementary material
Source: PubMed Central journal article supplement (PMC6467783)
Supplement: NIHMS1523340-supplement-1.pdf [file NIHMS1523340-supplement-1.pdf]

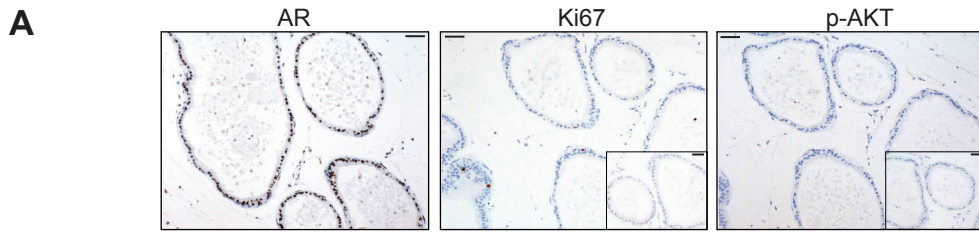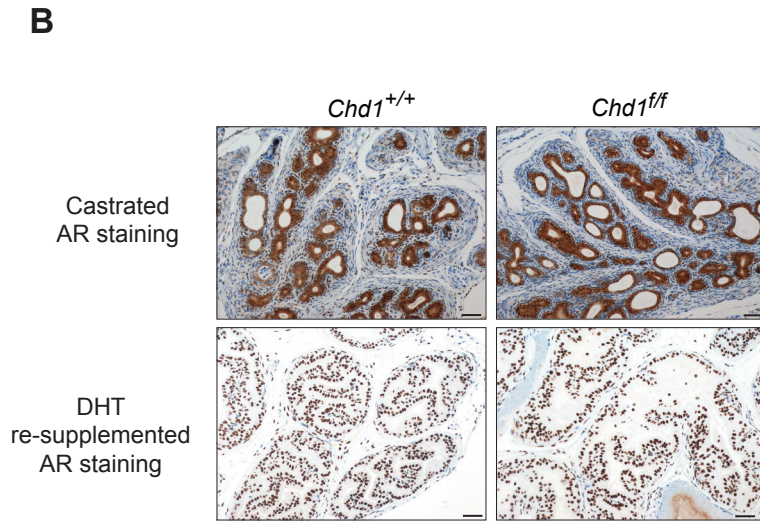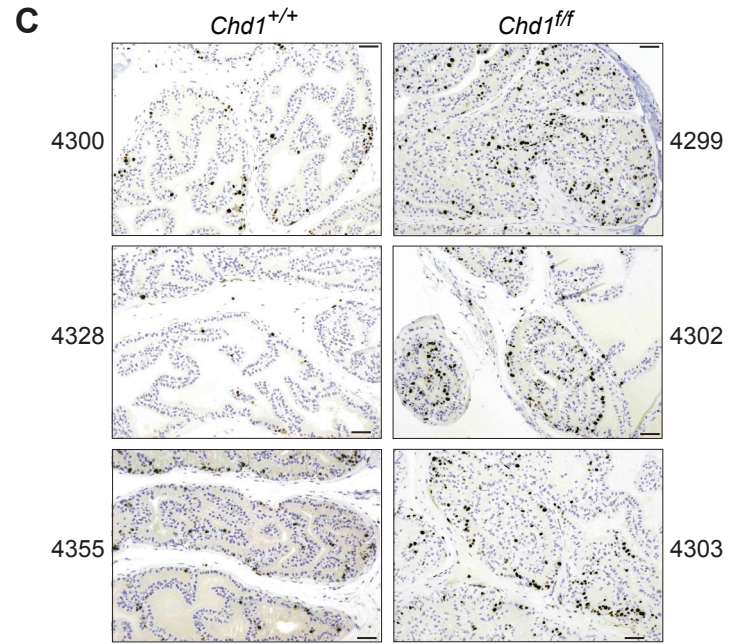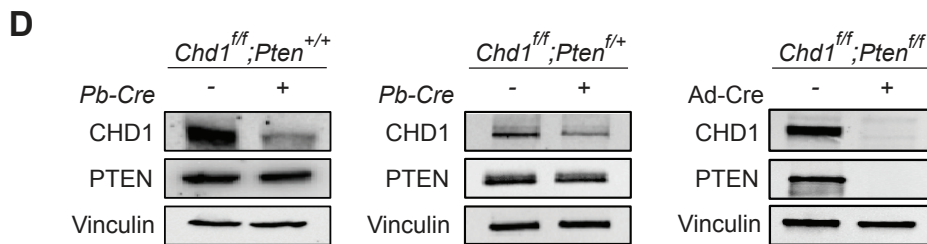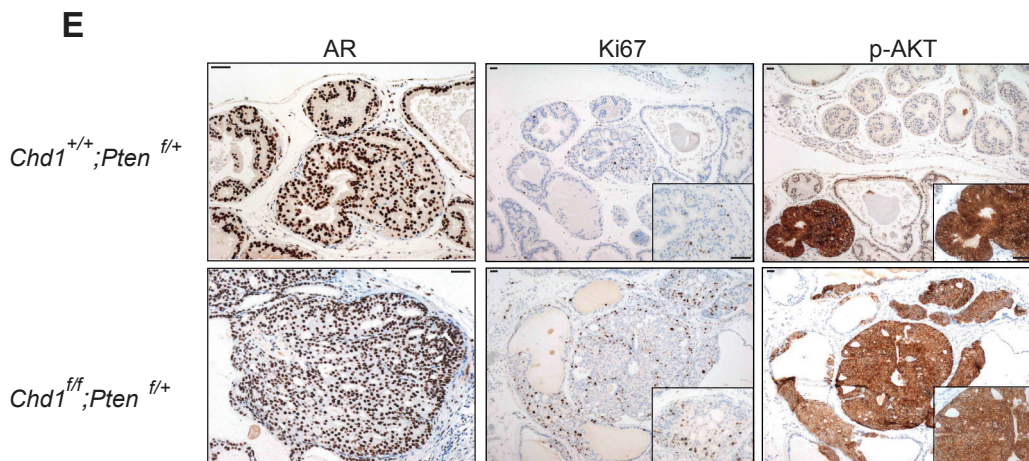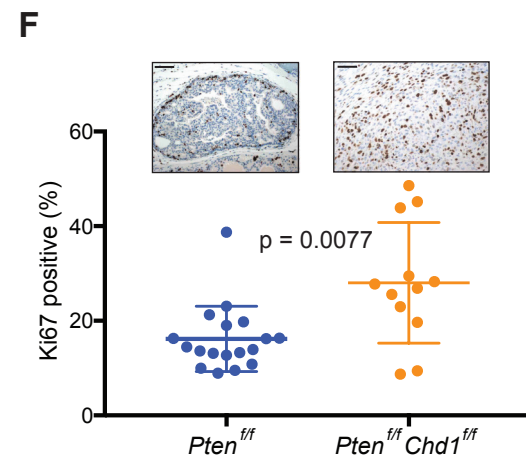

**Figure S1. *Chd1* loss exacerbates neoplastic phenotypes *in vivo*. Related to Figure 1.**

(A) Representative images of immunostaining from 1 year old *Chd1<sup>ff</sup>;Pb-Cre<sup>+</sup>* prostates stained for AR, Ki67, and p-AKT. Scale bar 50  $\mu$ m.

(B) Immunohistochemical staining for AR in murine prostates after castration (top-cytoplasmic staining) or castration-androgen re-supplementation (bottom-nuclear staining). Scale bar 50  $\mu$ m.

(C) Staining of murine prostates for Ki67 2 weeks post testosterone re-supplementation. 3 independent *Chd1<sup>+/+</sup>* and *Chd1<sup>ff</sup>* mice are shown (n = 4 *Chd1<sup>+/+</sup>* and n = 6 *Chd1<sup>ff</sup>*). Adjacent numbers are in-house identifiers of individual mice. Scale bar 50  $\mu$ m.

(D) Immunoblots of murine prostates of the given genotype.

(E) Immunohistochemistry for AR, Ki67, and p-AKT from 1 year old prostates of the given genotype. Scale bar 50  $\mu$ m.

(F) Quantification of Ki67 from *Chd1<sup>+/+</sup>;Pten<sup>ff</sup>;Pb-Cre<sup>+</sup>* and *Chd1<sup>ff</sup>;Pten<sup>ff</sup>;Pb-Cre<sup>+</sup>* mice at 1 year of age. Comparison utilized a student's t-test. Scale bar 50  $\mu$ m. Data represents +/- SEM.

**A**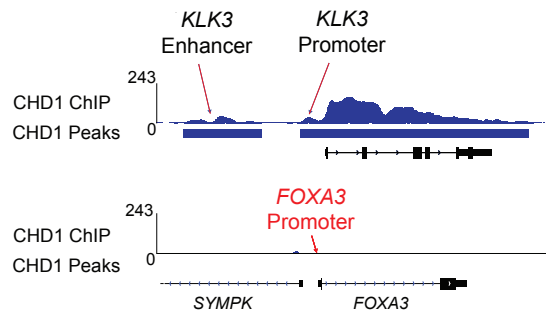**B**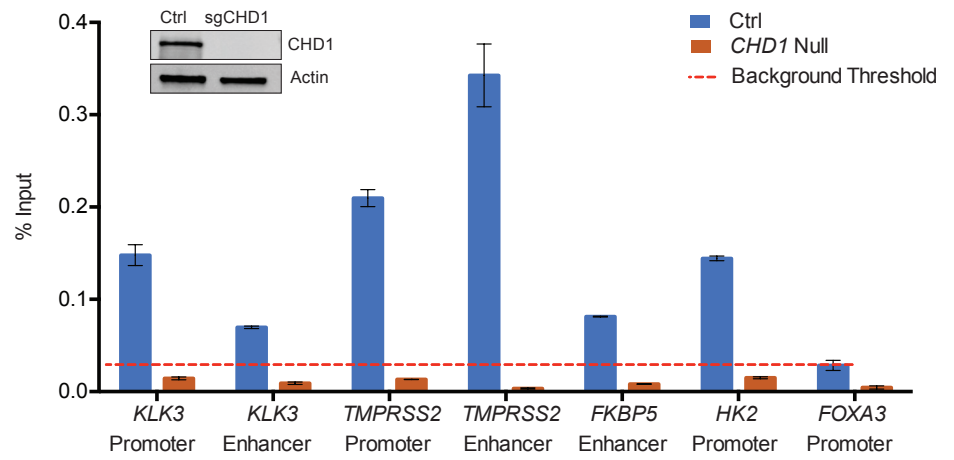

**Figure S2. Genome-wide binding of CHD1 is specific to CHD1 expressing cells. Related to Figure 2.**

**(A)** Snapshot of CHD1 ChIP Seq signal at the *KLK3* locus (positive for binding) and *FOXA3* promoter (negative for binding).

**(B)** LNCaP cells CRISPR engineered to eliminate expression of CHD1 (inset immunoblot), were assessed for background CHD1 ChIP signal under androgen proficient conditions at several positive and negative CHD1 loci (determined by ChIP Seq) by qPCR. The *FOXA3* promoter serves as a negative background control signal (indicated by horizontal red dotted line). Data represents +/- SEM.

A

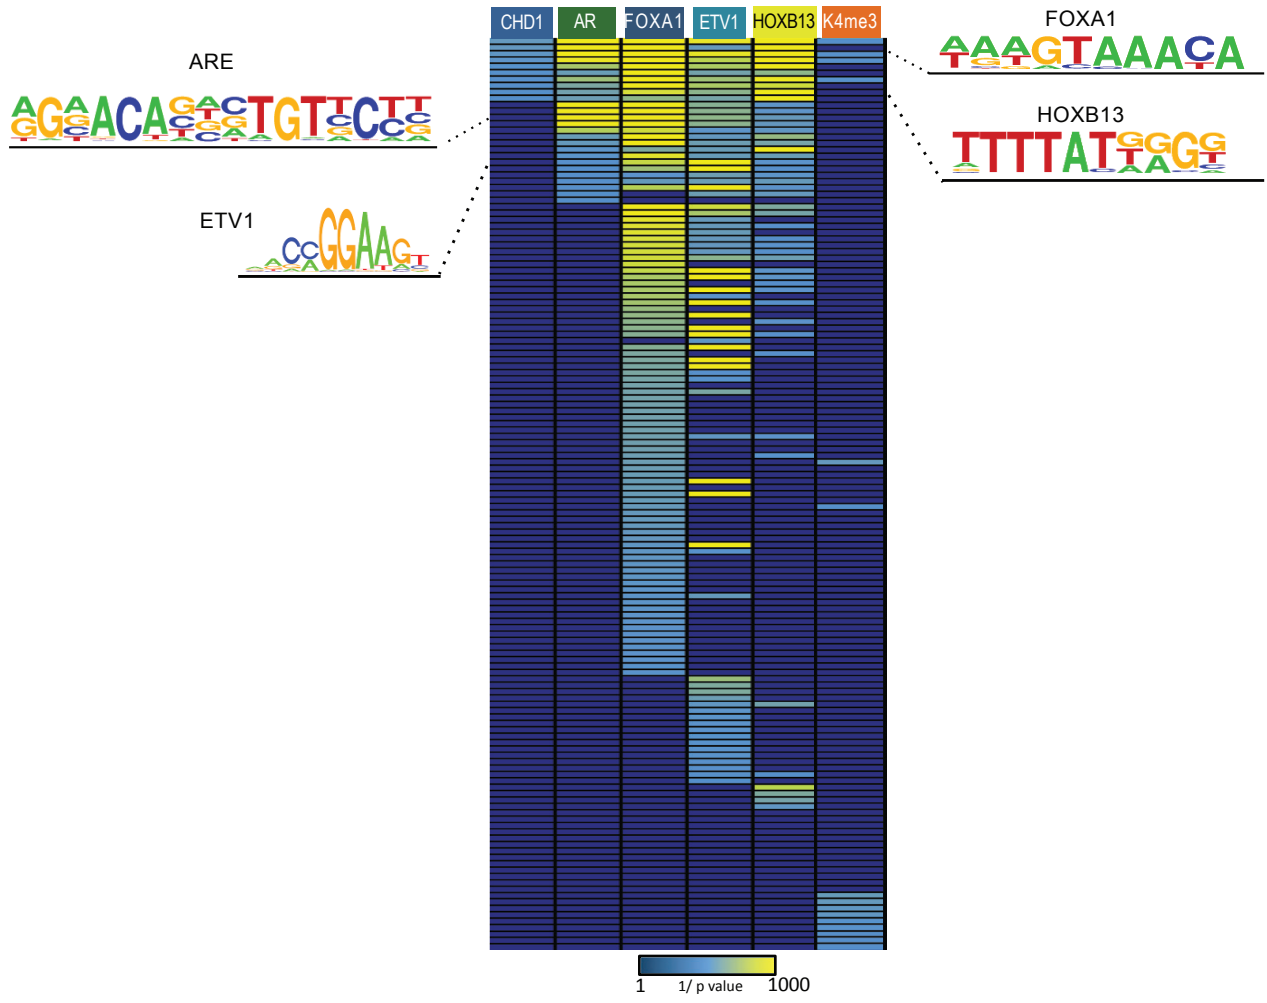

**Figure S3. Genome-wide binding of CHD1 is not significantly associated with any one motif.**

**Related to Figure 4.**

(A) ChIP sequencing peaks for CHD1, AR, H3K4me3, HOXB13 (Pomerantz et al., 2015), ETV1 (Chen et al., 2013), and FOXA1 (Zhao et al., 2016), were analyzed for motif enrichment within a 200 bp window around the peak center. All Jasper motifs with a p value less than 0.01 are plotted for each factor.

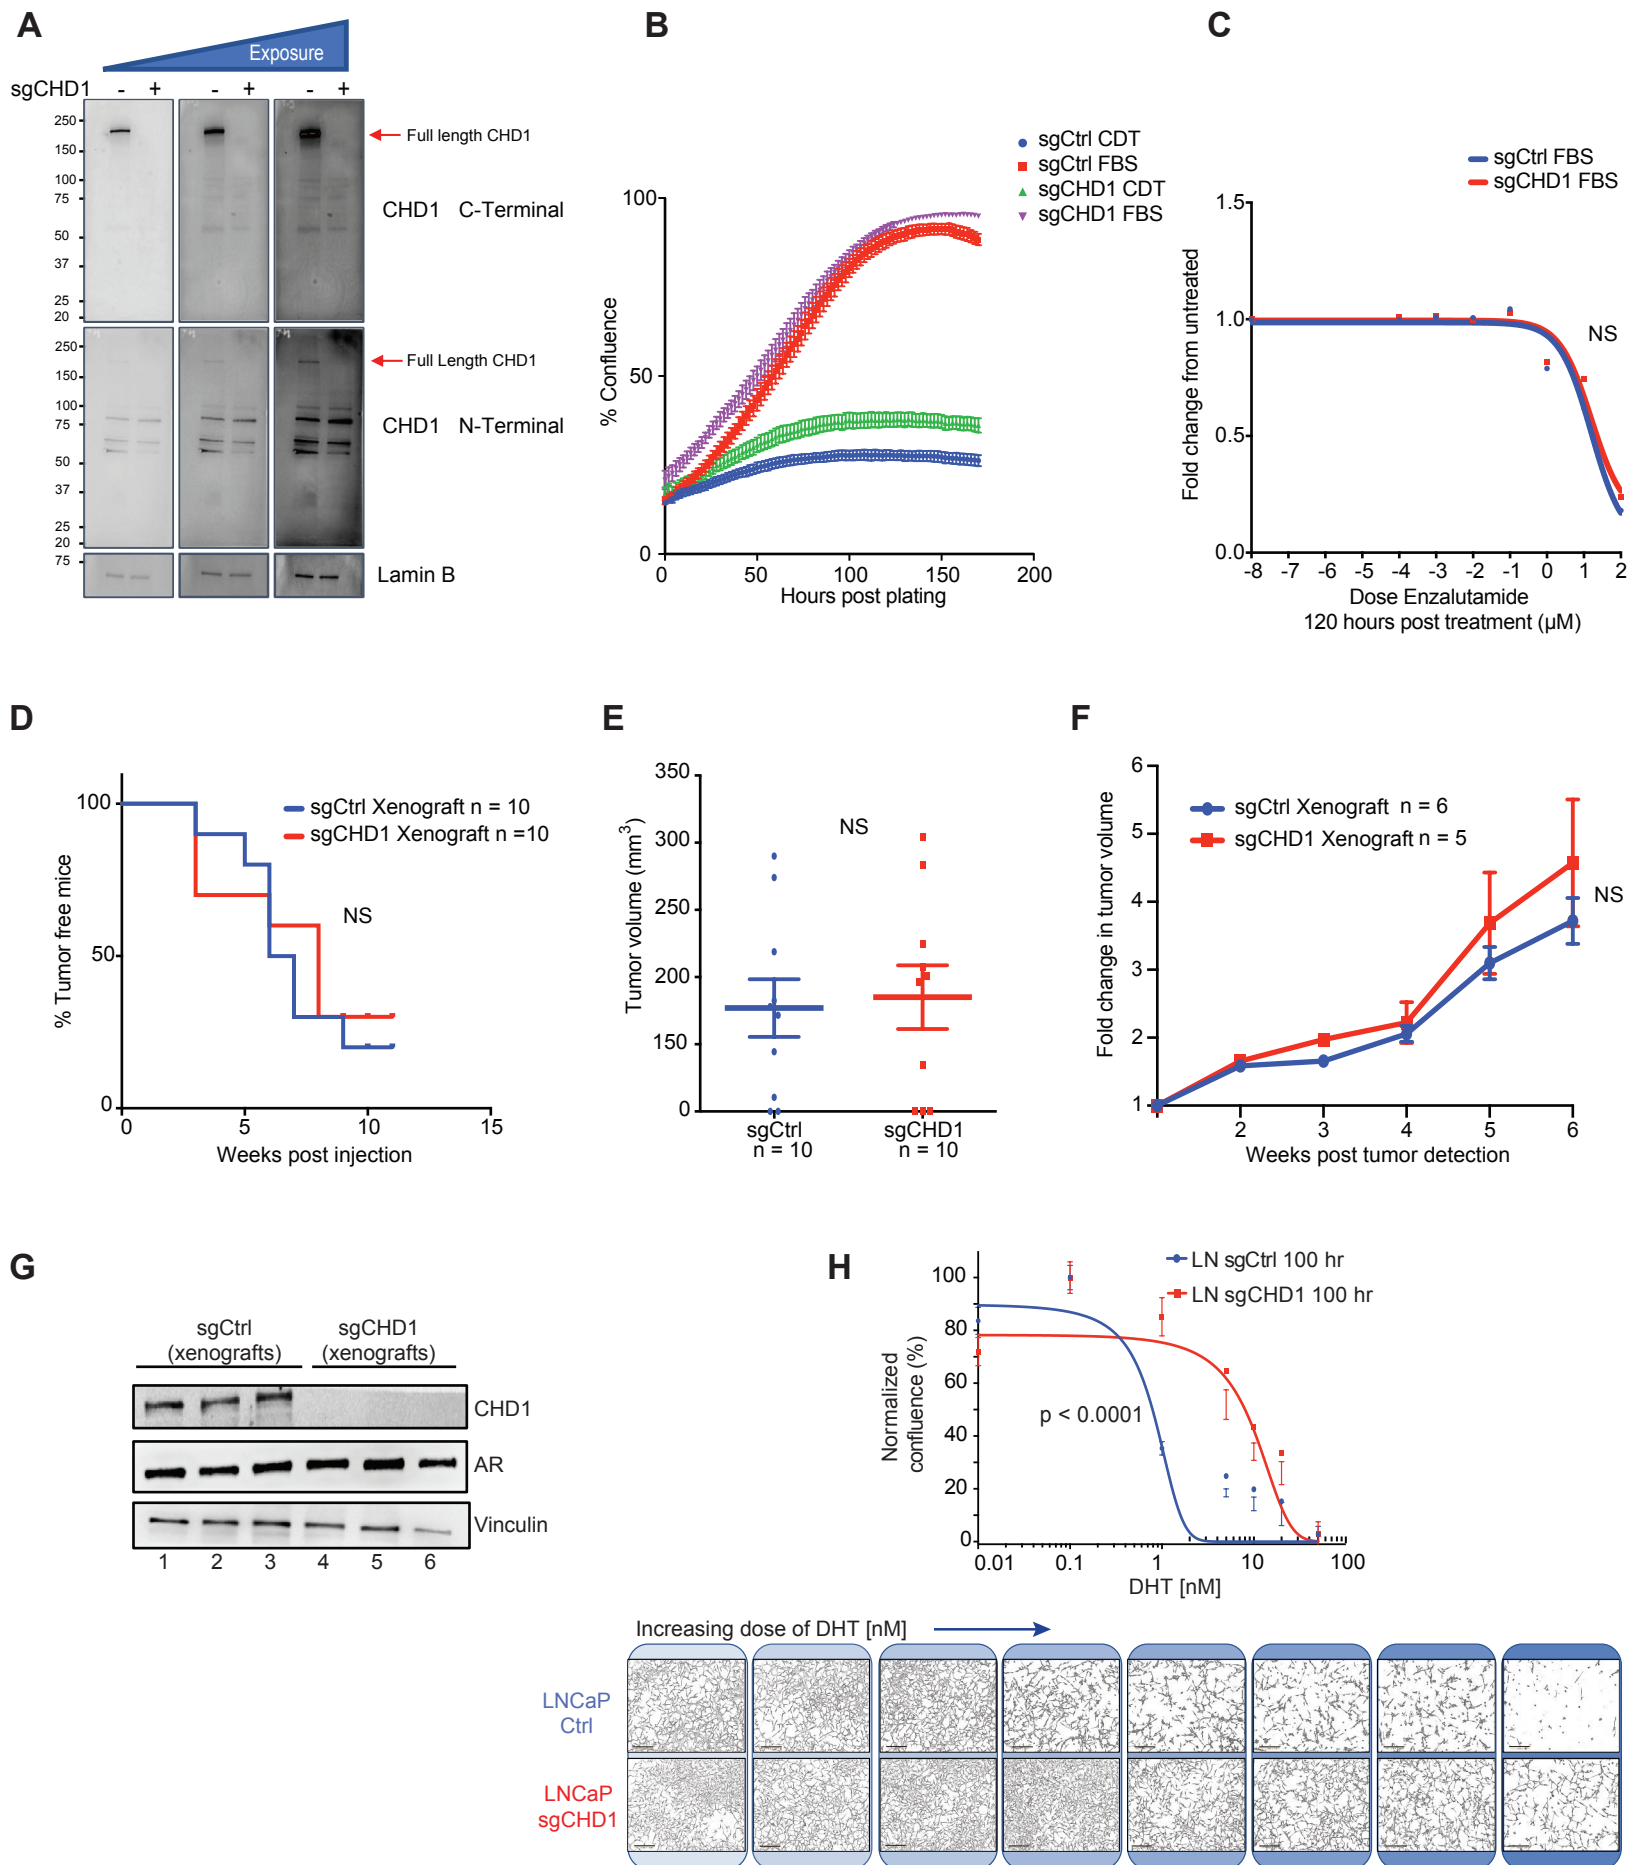

**Figure S4. Models of *CHD1* genomic loss of are sensitive to androgen status and show no defects in growth or tumorigenicity *in vivo*. Related to Figure 5.**

(A) LNCaP cells stably expressing sgCtrl or sgCHD1 guide RNAs were assessed for CHD1 expression using antibodies directed against the N or C terminus of human CHD1. Full gels are shown for each antibody with increasing exposure images shown from left to right.

(B) Models from A were grown in androgen proficient (FBS) or androgen deficient (Charcoal Dextran Treated-FBS) conditions and growth (confluency) was measured over time.

(C) Models from A were treated with increasing doses of Enzalutamide and growth (Incucyte-confluency) measured over time. Fold change in confluency from vehicle was calculated for each dose. Non-linear regression was used to define IC<sub>50</sub> values.

(D) Models from A were injected into the flanks of athymic male mice (6-8 weeks of age) and monitored for tumor growth over time.

(E) Volume of all tumors injected 10 weeks post injection (mm<sup>3</sup>).

(F) Tumor volume for each line is plotted as a function of initial volume at the time of detection.

(G) Individual tumors were harvested from mice and grown as 3D organoids in matrigel. After 3 passages, each individual tumor-organoid was assessed for CHD1 and AR status via immunoblot.

(H) Dose response curve of each cell line in response to DHT, calculated as in C (top) and, representative images of each cell line at each dose of androgen 96 hours post plating (bottom).

Scale bar 20 μm.

For all panels in this figure, data represents +/- SEM. NS - not significant.



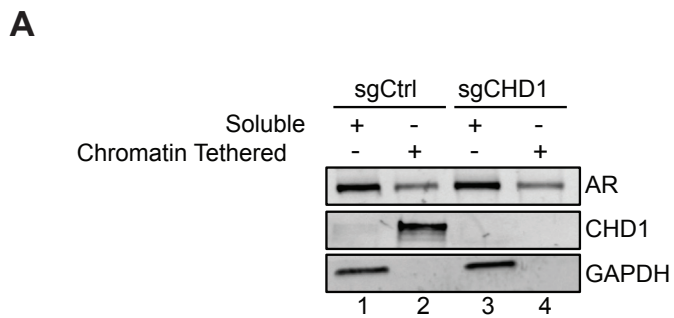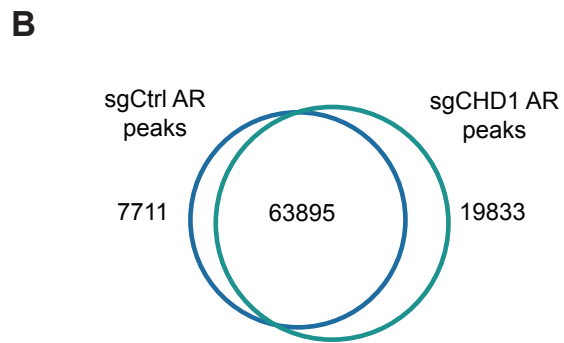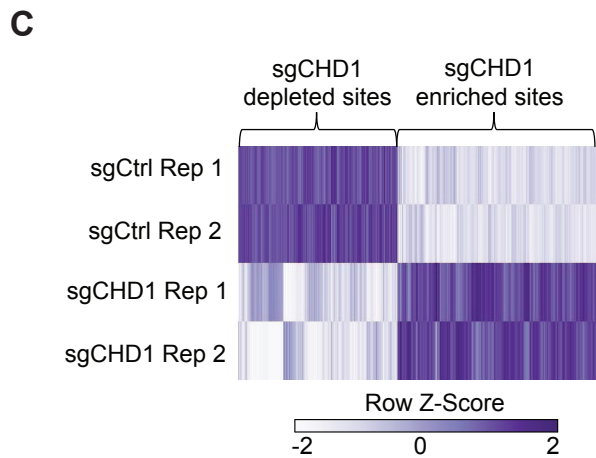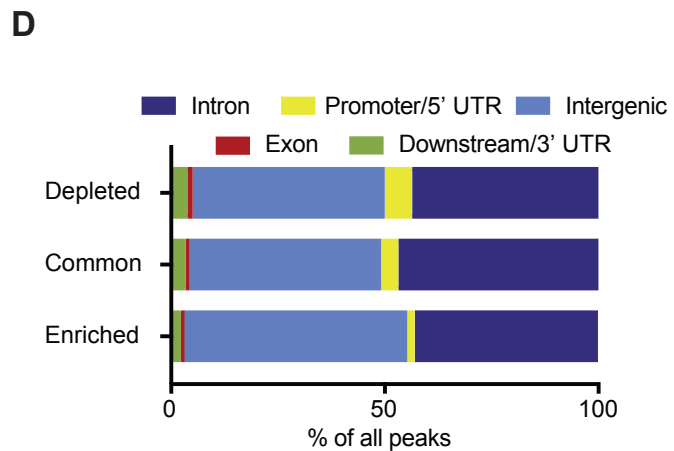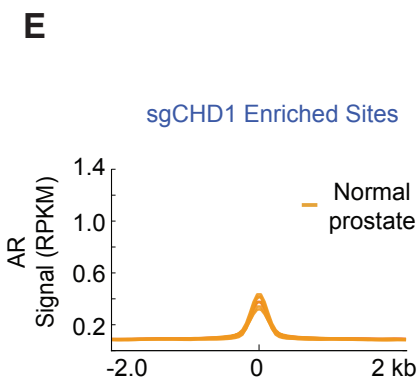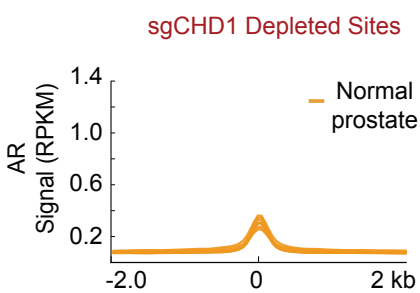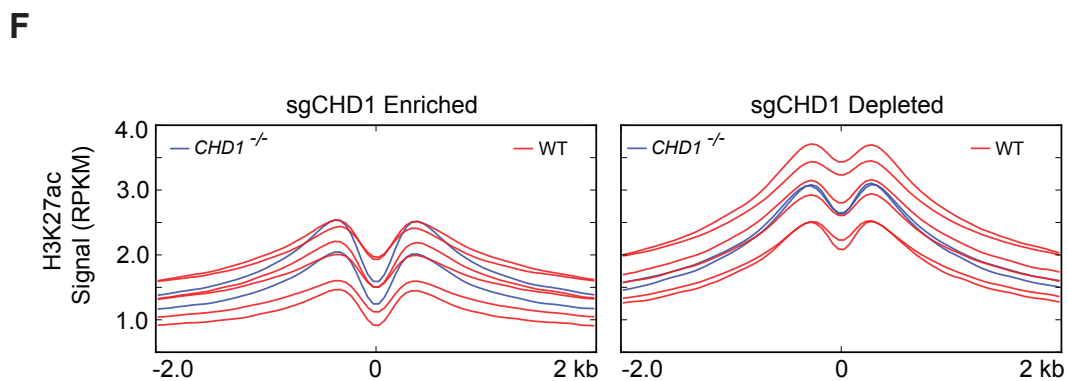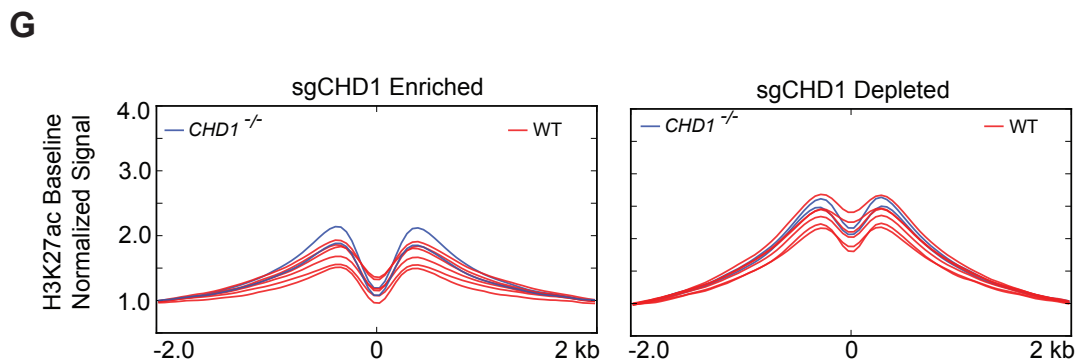

**Figure S5. *CHD1* loss redistributes AR to subclass-enriched enhancer sites. Related to Figure 5.**

**(A)** Chromatin tethering of AR and CHD1 in sgCtrl and sgCHD1 cell in the presence of androgen (similar to ChIP seq conditions). GAPDH serves as a soluble specific control.

**(B)** Peak overlap for AR in Ctrl and sgCHD1 LNCaP cells. Peaks were called using MACS2 and  $q$  of 0.05. The overlap window was set at a minimum of 1 bp.

**(C)** Heatmap of individual replicate z-score for differentially bound peaks between sgCtrl and sgCHD1 cells, determined using the DiffBind R package (FDR = 0.01).

**(D)** CEAS analysis of differentially bound and common peaks identified in C.

**(E)** AR ChIP seq from normal prostate tissue ( $n = 7$ ) (GSE70079-(Pomerantz et al., 2015)) was assessed for enrichment at sgCHD1 enriched and depleted sites.

**(F)** H3K27ac ChIP sequencing derived from primary human prostate tumors (GSE96652-(Kron et al., 2017)) was analyzed for signal pileup at sgCHD1 enriched and depleted sites and annotated for *CHD1* genomic status (*CHD1* null-blue and *CHD1* WT-red) utilizing the published bigwig files.

**(G)** The baseline signal for each individual tumor from F was normalized to 1 and plotted at sgCHD1 enriched and depleted sites.

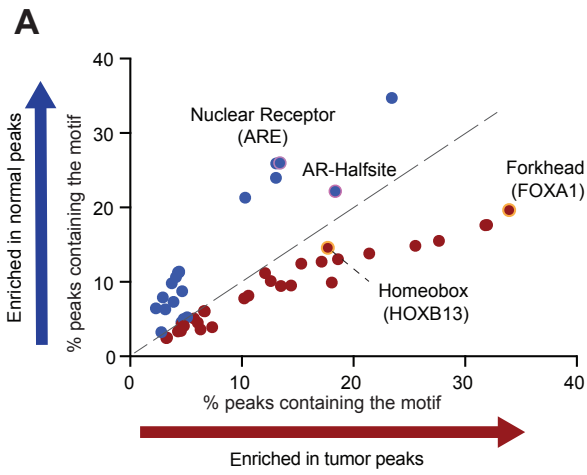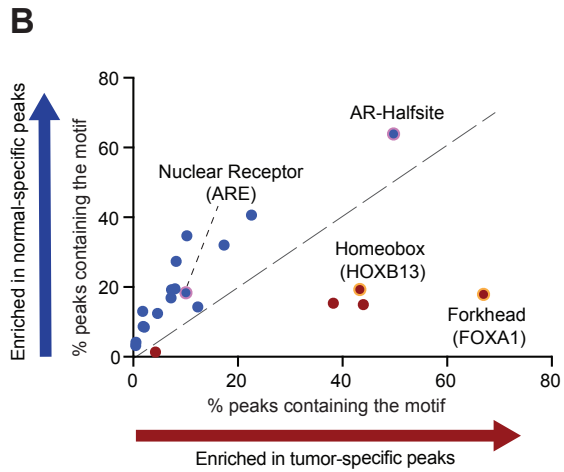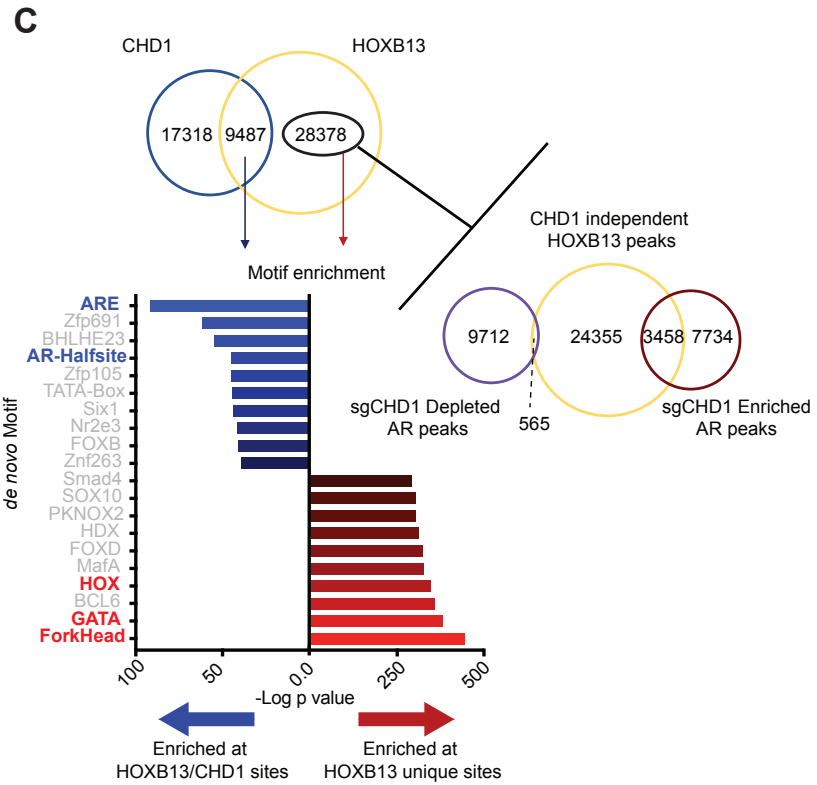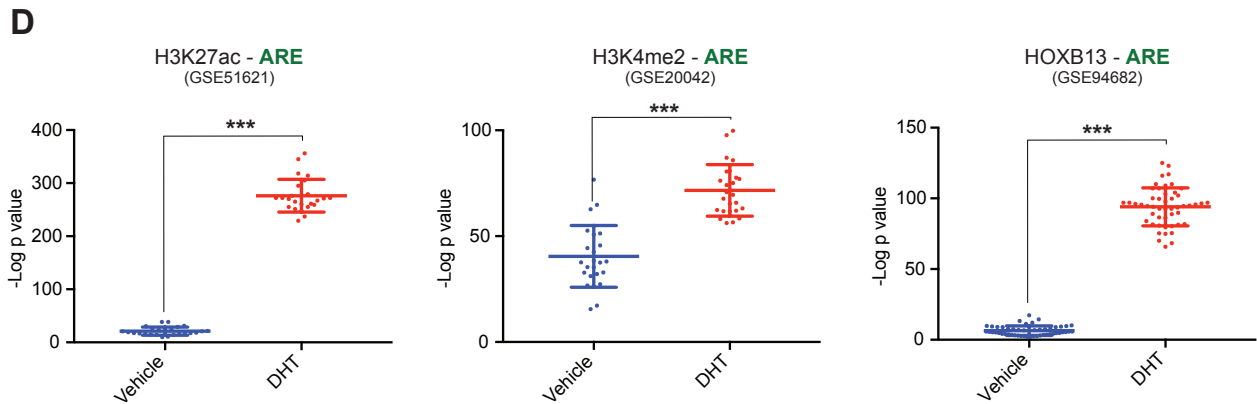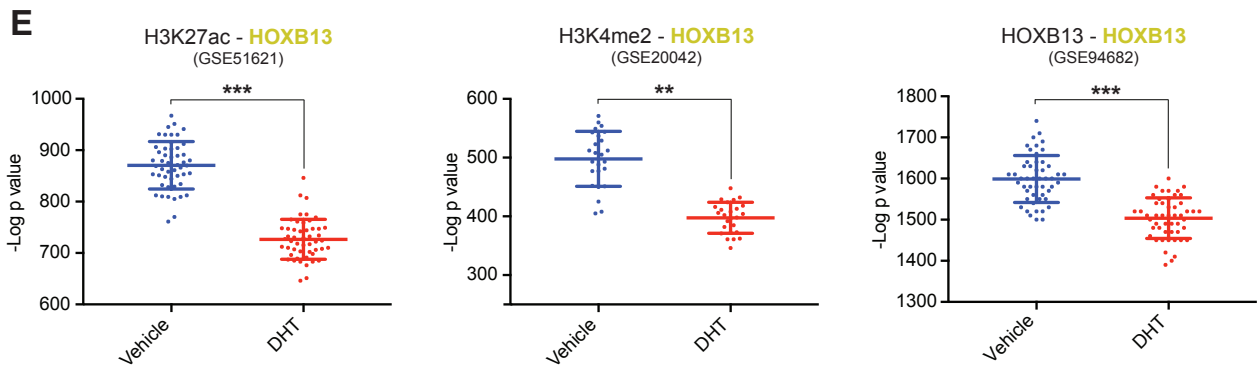

**Figure S6. The CHD1 null AR cistrome is enriched for CHD1 independent HOX motifs .**

**Related to Figure 6.**

**(A)** Peaks derived from AR ChIP seq from normal (n = 7) and primary PCa (n = 13) (GSE70079- (Pomerantz et al., 2015)) were merged and assessed for motif enrichment around the center of each peak using Homer v3. The % of peaks (background subtracted) containing significantly enriched motifs ( $p < 10^{-20}$ ) is plotted for both normal and tumor samples. The dotted line separates normal (blue) from tumor (red) enrichment.

**(B)** Motif analysis reported in (Pomerantz et al., 2015) of peaks uniquely enriched in either normal or tumor tissue, is plotted as in A and demonstrates an enrichment of HOX and FOX motifs and depletion of AR Half-site motifs in the PCa-specific AR cistrome.

**(C)** The overlap between the CHD1 and HOXB13 ((Pomerantz et al., 2015) cistromes in LNCaP cells is reported (top) and motif enrichment for common (blue) or CHD1 independent HOXB13 peaks (red) was performed using the opposing dataset as background. The top 10 *de novo* motifs are shown for each peak set (bottom). The overlap between the CHD1 independent HOXB13 cistrome and AR enriched and depleted peaks in sgCHD1 cells (right).

**(D)** LNCaP cells deprived of testosterone and then treated with vehicle or androgen were assessed for the ARE motif at H3K4me2 (GSE20042 - (He et al., 2010)), H3K27ac (GSE51621 - (Hazelett et al., 2014)), and HOXB13 (GSE94682 - (Stelloo et al., 2018)) ChIP Seq peaks. Pre-called peaks were randomly sampled 25x for ARE enrichment, and the mean of each condition is reported. 2 tailed students t-test; \*\*  $p < 0.005$ , \*\*\*  $p < 0.0001$ . Data represents +/- SEM.

(E) Enrichment of the HOXB13 motif was assessed for each condition as in D. 2 tailed students t-test; \*\*  $p < 0.005$ , \*\*\*  $p < 0.0001$ . Data represents +/- SEM.

**A**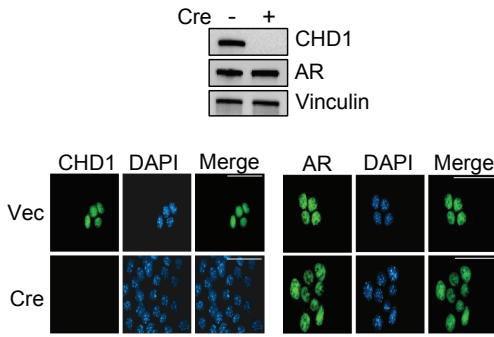**B**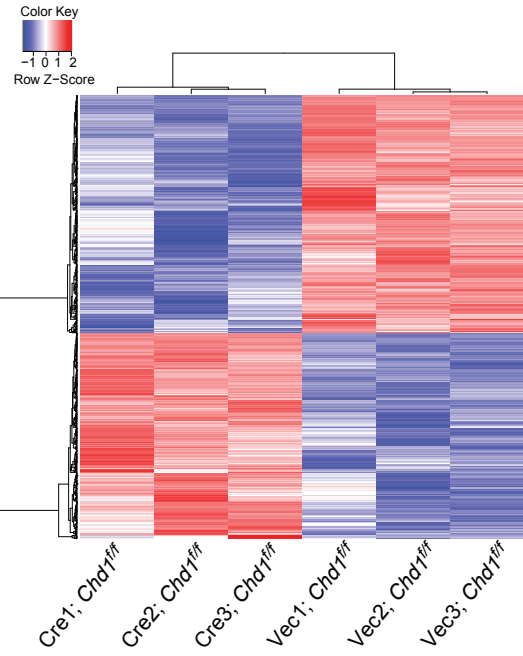**C***CHD1* deficient signature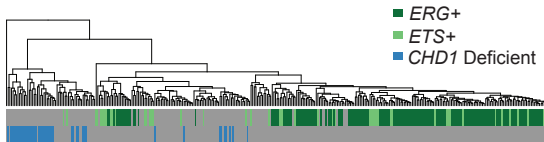

Apply to LNCaP RNA Seq

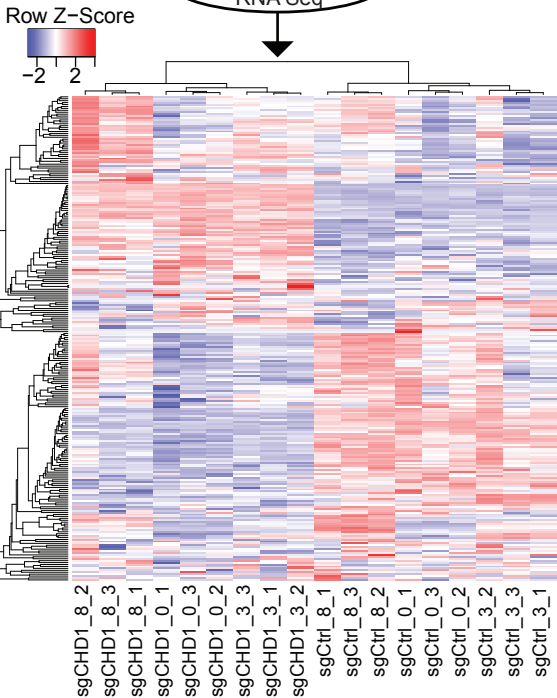**D**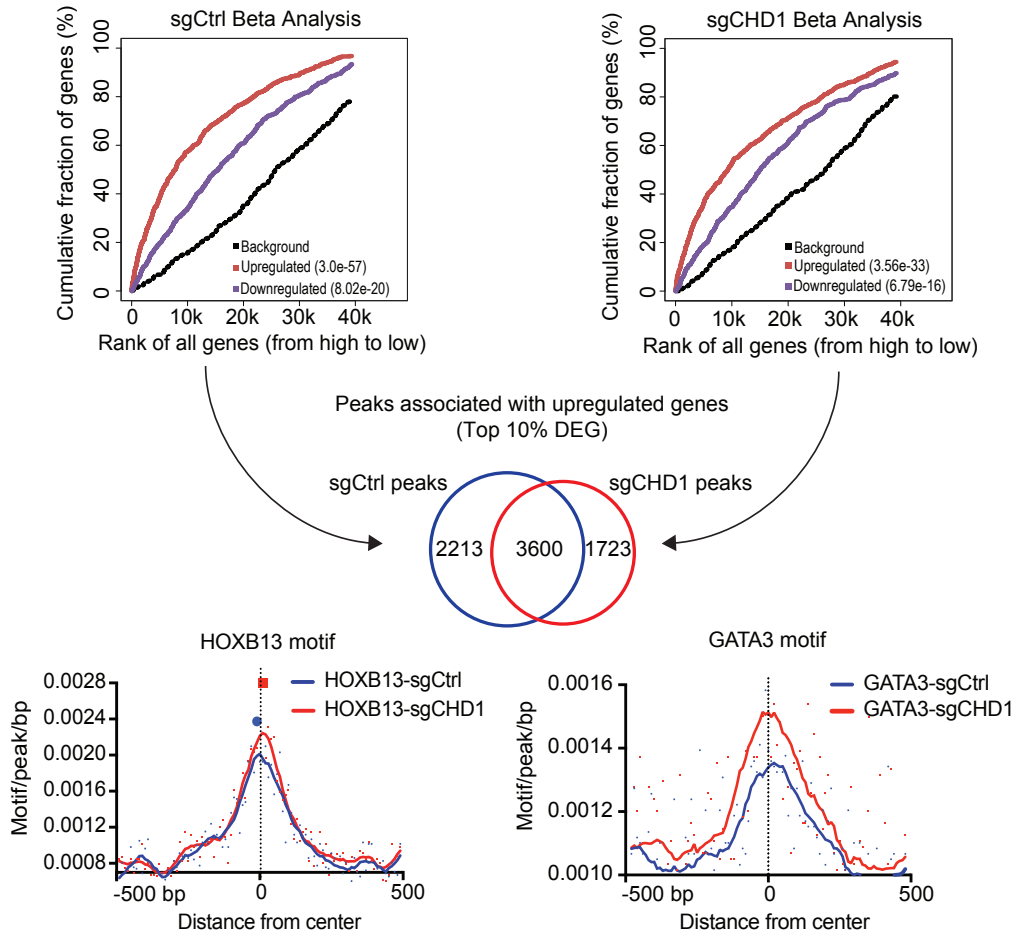

**Figure S7. Prostate derived models of *CHD1* loss display unique patterns of transcriptional regulation. Related to Figure 7.**

**(A)** Organoids were derived from the prostate of a 3-month-old male mouse with homozygously floxed *Chd1* alleles, grown for 2 passages, then treated with either vector or Cre expressing Adenovirus for 12 hours. 96 hours post infection, cells were harvested for immunoblotting to validate *Chd1* deletion and AR positivity (top). Organoids were stained for CHD1 and AR via immunofluorescence to confirm a homogenous population of CHD1 null and AR positive cells (bottom). Scale bar 20  $\mu$ m.

**(B)** Heatmap of significantly differentially expressed genes (RNA-Seq) in cells derived from A.

**(C)** Clustering of primary PCa samples (TCGA) based upon a *CHD1* null tumor signature derived from TCGA data (top) and clustering the isogenic model of *CHD1* loss in LNCaPs (RNA-seq 0, 3, and 8 hours of DHT) based upon the *CHD1* null signature above (bottom).

**(D)** Beta analysis of isogenic LNCaP model of *CHD1* loss utilizing the identified AR cistrome (all peaks) and transcriptional changes (RNA-seq at 0 vs 8 hours 1 nM DHT) in each cell model. Peaks were identified for the top 10% of the differentially expressed genes for each model and motif density for each peak set determined for HOXB13 and GATA3.

**Table S5: Detailed primer list, related to STAR Methods.**

| Name                     | Sequence 5'--->3'              | Ref                              |
|--------------------------|--------------------------------|----------------------------------|
| <i>KLK3</i> enhancer F   | TGGGACAACCTTGCAAACCTG          | Shang et al., 2002 Mol Cell      |
| <i>KLK3</i> enhancer R   | CCAGAGTAGGTCTGTTTTCAATCCA      |                                  |
| <i>TMPRSS2</i> ARE V F   | TGGTCCTGGATGATAAAAAAAGTTT      | Wang et al., 2007 Mol Cell       |
| <i>TMPRSS2</i> ARE V R   | GACATACGCCCCACAACAGA           |                                  |
| <i>FOXA3</i> Promoter F  | ATGGGGATGTGATTTTCGGGG          | This paper                       |
| <i>FOXA3</i> Promoter R  | AATCAGAACGCTAGGGCCAC           |                                  |
| <i>KLK3</i> promoter F   | CCTAGATGAAGTCTCCATGAGCTACA     | Shang et al., 2002 Mol Cell      |
| <i>KLK3</i> promoter R   | GGGAGGGAGAGCTAGCACTTG          |                                  |
| <i>FKBP5</i> ARE 6/7 F   | CCCCCCTATTTTAATCGGAGTAC        | Magee et al., 2006 Endocrinology |
| <i>FKBP5</i> ARE 6/7 R   | TTTTGAAGAGCACAGAACACCCT        |                                  |
| <i>HK2</i> Promoter F    | CTTCTGCAGCGCGAGTTC             | Anderson et al., 2012 JCI        |
| <i>HK2</i> Promoter R    | GAACCGCTCGTCTCCTACAC           |                                  |
| <i>Chd1</i> genotyping F | AGAGGACAGCGTGACTAAAGC          | This paper                       |
| <i>Chd1</i> genotyping R | CATTCCATCAAACAATTAGAACCACATCTT |                                  |
| <i>Pten</i> WT F         | ATTAAACTGCTTGACAGCACAGC        | Wu et al., 2001                  |
| <i>Pten</i> WT R         | AGAAAGCTCTTCACTGCACACA         |                                  |
| <i>Pten</i> floxed F     | CTTGACAGCACAGCGTTGT            | Wu et al., 2001                  |
| <i>Pten</i> floxed R     | TGTATGCTATACGAAGTTATTAGGTCCCT  |                                  |



**Table S6: Detailed antibody usage, related to STAR Methods.**

| Name                             | Company        | Application        | Dilution          | Cat #      |
|----------------------------------|----------------|--------------------|-------------------|------------|
| Alexa Fluor 488 Goat anti-mouse  | Invitrogen     | IF                 | 1:500             | A-11029    |
| Alexa Fluor 555 Goat anti-rabbit | Invitrogen     | IF                 | 1:500             | A-21428    |
| alpha-Tubulin                    | Cell Signaling | Immunoblot         | 1:1000            | 2144S      |
| Androgen Receptor                | Abcam          | IHC                | 1:500             | ab108341   |
| Androgen Receptor                | Abcam          | ChIP               | 4 µg              | ab74272    |
| Androgen Receptor                | Abcam          | PLA                | 1:500             | ab9474     |
| Androgen Receptor                | Santa Cruz     | ChIP/Immunoblot/IF | 4 µg/1:1000/1:500 | sc-816 X   |
| anti-goat HRP                    | Thermo Fisher  | Immunoblot         | 1:5000            | 31402      |
| anti-rabbit HRP                  | Pierce         | Immunoblot         | 1:5000            | 32260      |
| c-MYC                            | Santa Cruz     | ChIP               | 8 µg              | sc-764 X   |
| CHD1                             | Bethyl         | ChIP               | 10 µg             | A301-218A  |
| CHD1                             | Cell Signaling | IF/PLA/Immunoblot  | 1:50/1:50/1:1000  | 4351S      |
| H3K27me3                         | Abcam          | ChIP               | 2 µg              | ab195477   |
| H3K4me2                          | Abcam          | ChIP               | 2 µg              | ab7766     |
| H3K4me3                          | Abcam          | ChIP               | 2 µg              | ab8580     |
| HOXB13                           | Santa Cruz     | Immunoblot         | 1:1000            | sc-66923   |
| Lamin B                          | Santa Cruz     | Immunoblot         | 1:1000            | sc-6217    |
| Mouse IgG                        | BioLegend      | RIME               | 4 µg              | 400102     |
| Rabbit IgG                       | Abcam          | RIME               | 4 µg              | ab37415    |
| Vinculin                         | Abcam          | Immunoblot         | 1:1000            | ab129002   |
| Beta-actin                       | Invitrogen     | Immunoblot         | 1:1000            | PIMA515739 |
| mKi67                            | Abcam          | IHC                | 1:200             | ab16667    |
| CHD1                             | Active Motif   | Immunoblot         | 1:500             | 39730      |
